# Supplementary material
Source: PubMed Central journal article supplement (PMC3690541)

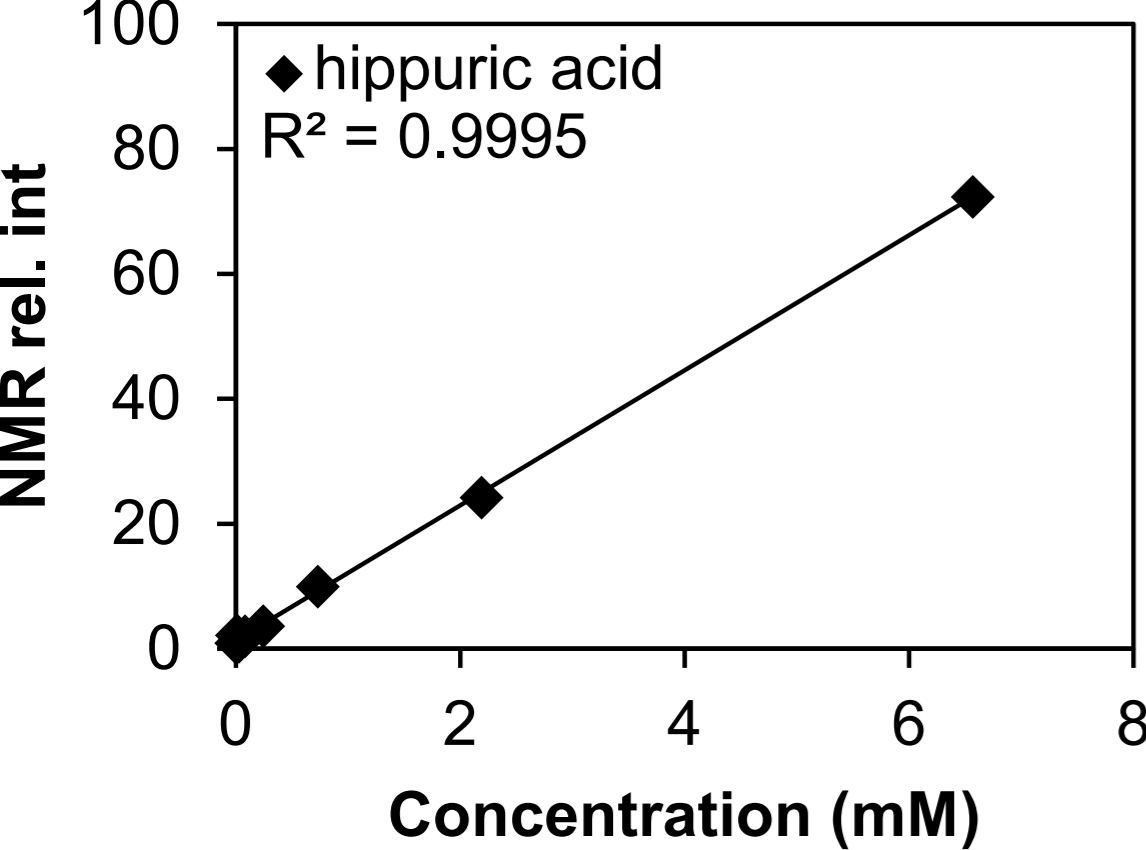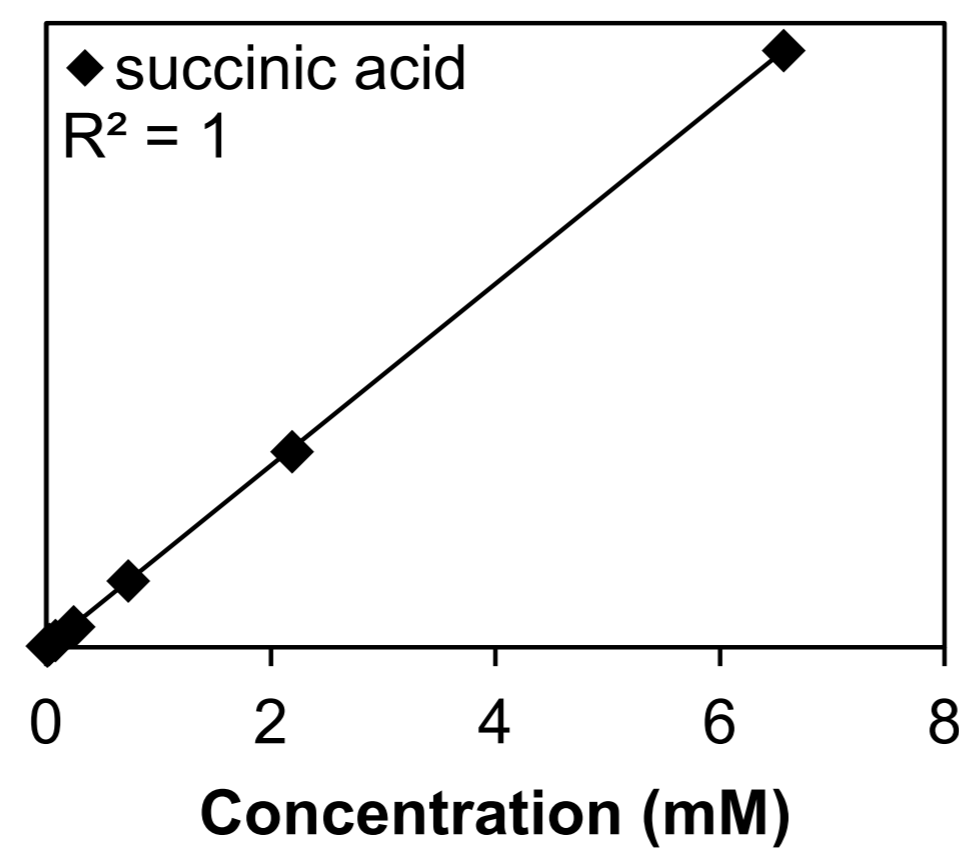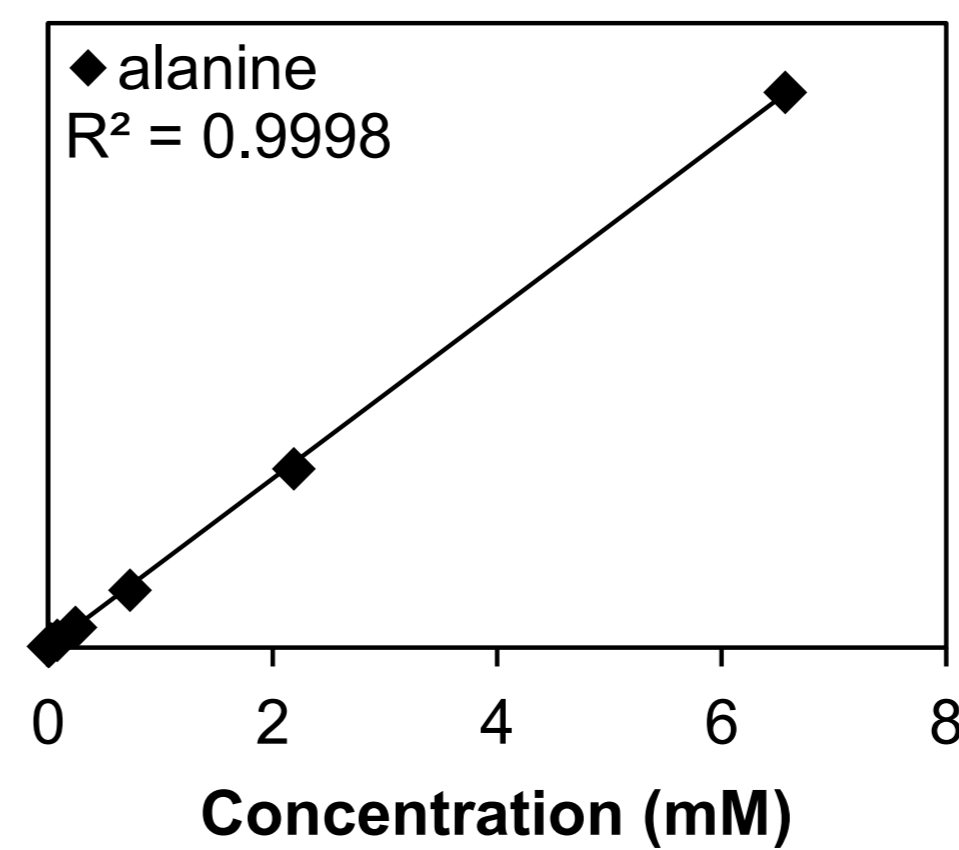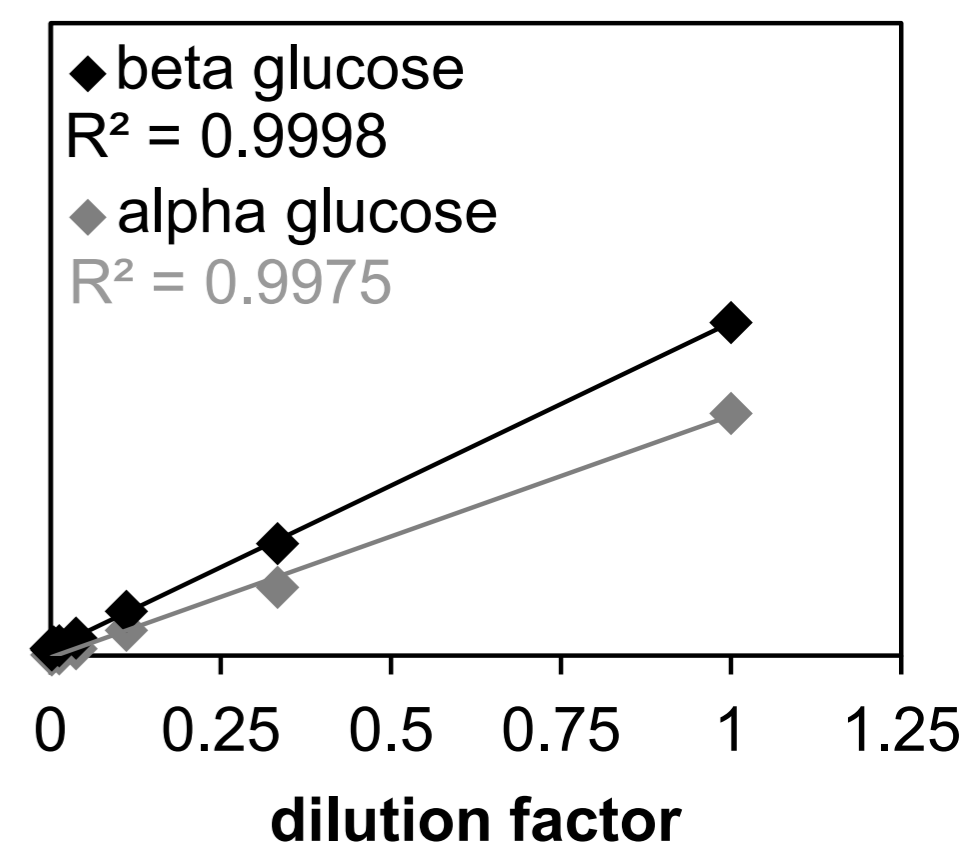

Supplement: ac4004776_si_002.pdf [file ac4004776_si_002.pdf]
